# Supplementary material for: Thrombospondin-2 as a Predictive Biomarker for Hepatocellular Carcinoma after Hepatitis C Virus Elimination by Direct-Acting Antiviral
Source: MDPI journal article supplement (doi:10.3390/cancers15020463), 2023-01-11
Supplement: s1 [file s1]

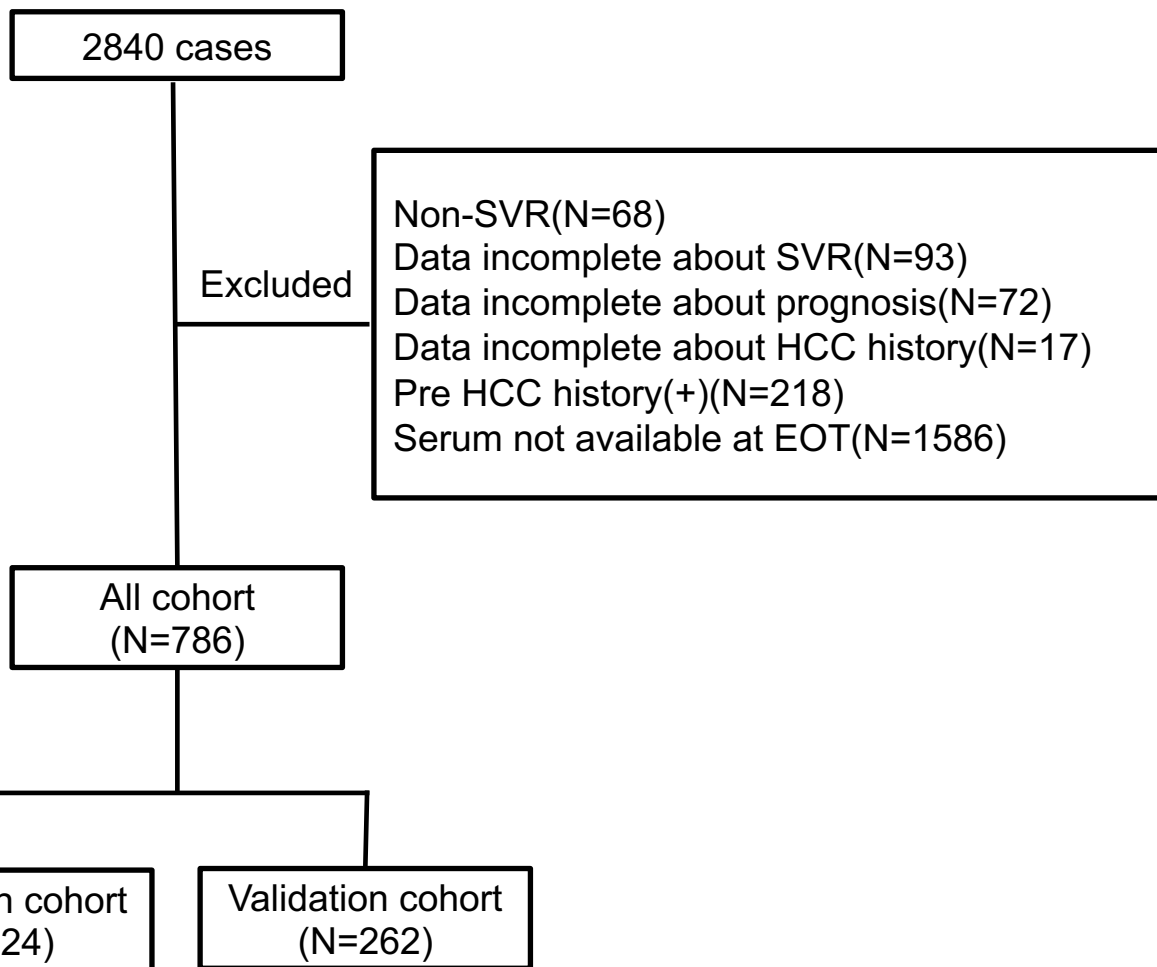

**Supplementary Figure S1**

**A**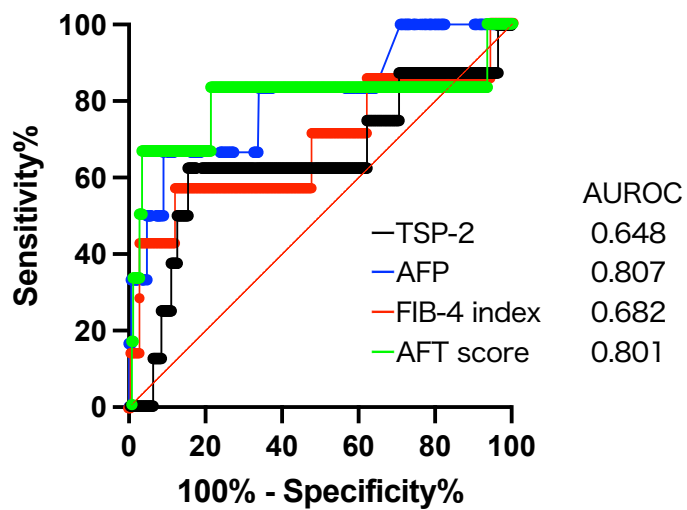**B**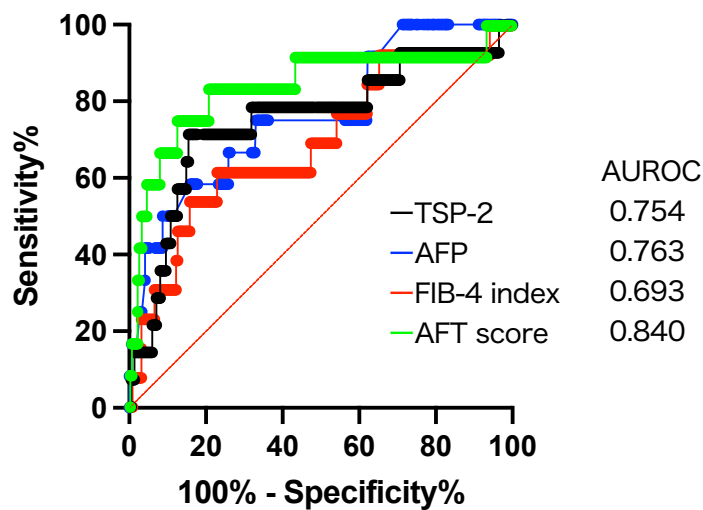**C**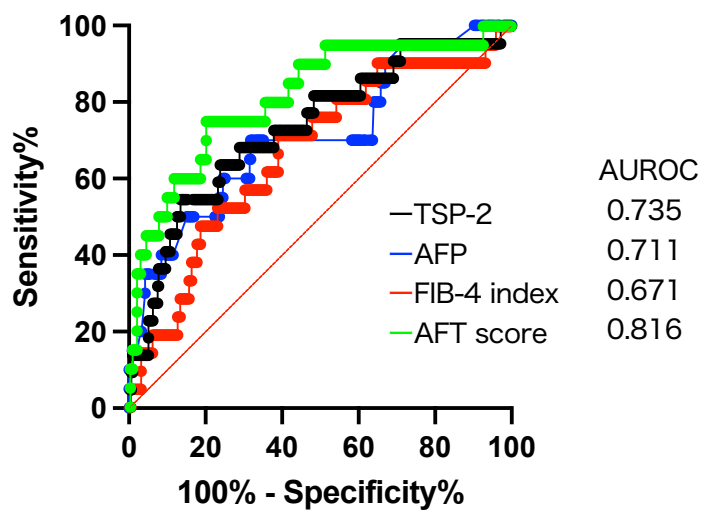**D**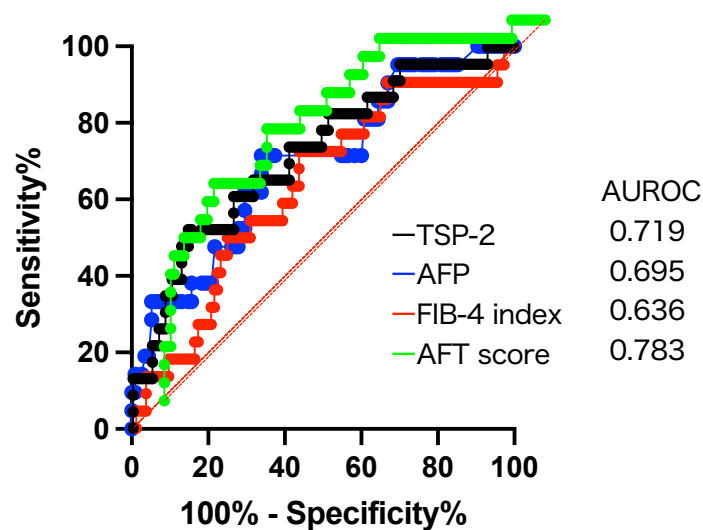**Supplementary Figure S2**

**A**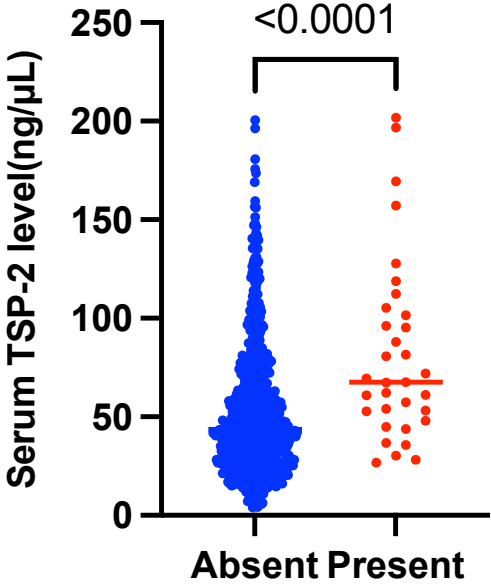**B**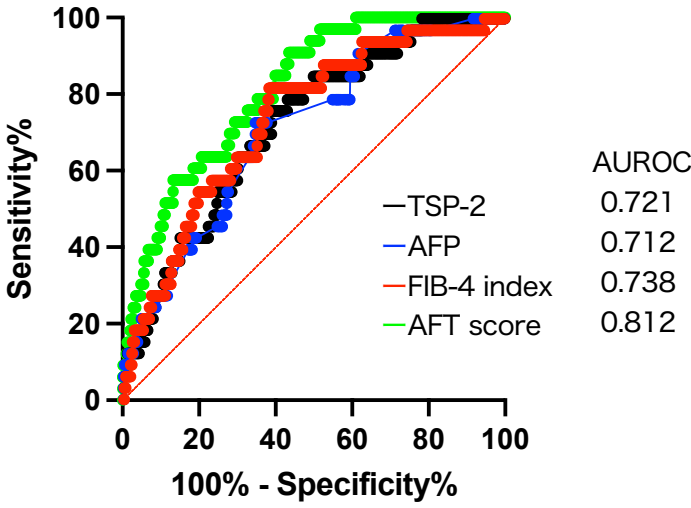**C**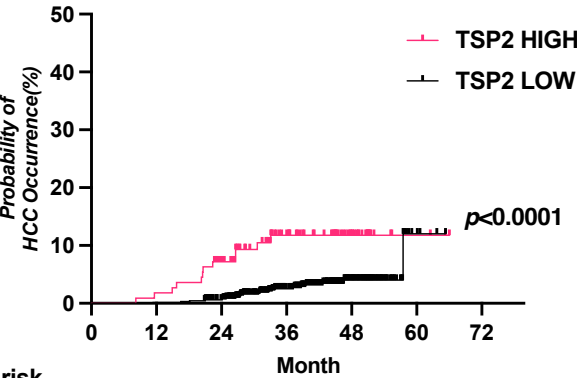

|                |     |     |     |     |     |   |
|----------------|-----|-----|-----|-----|-----|---|
| Number at risk |     |     |     |     |     |   |
| TSP-2 HIGH     | 111 | 109 | 98  | 61  | 26  | 3 |
| TSP-2 LOW      | 665 | 664 | 635 | 467 | 145 | 4 |

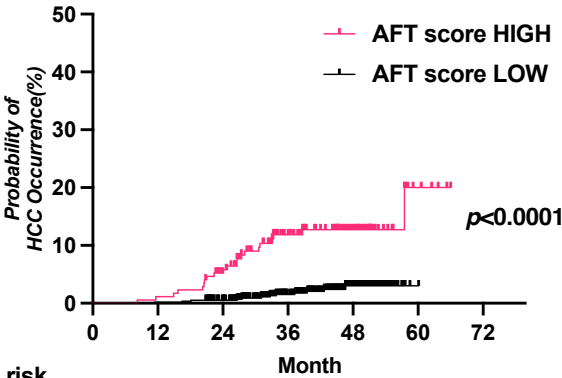

|                |     |     |     |     |     |   |
|----------------|-----|-----|-----|-----|-----|---|
| Number at risk |     |     |     |     |     |   |
| AFT score HIGH | 173 | 171 | 157 | 108 | 53  | 6 |
| AFT score LOW  | 587 | 586 | 561 | 414 | 116 | 1 |

**Supplementary Figure S3**

Supple Table S1. Correlation coefficient between TSP-2 and another factor in the derivation cohort

| Factor          | R      | <i>p</i> value |
|-----------------|--------|----------------|
| AST             | 0.366  | <0.0001        |
| Hyaluronic Acid | 0.354  | <0.0001        |
| ALT             | 0.351  | <0.0001        |
| Plt             | -0.247 | <0.0001        |
| Alb             | -0.150 | 0.0006         |
| HbA1c           | 0.116  | 0.014          |
| AFP             | 0.103  | 0.021          |
| BMI             | 0.074  | 0.102          |
| Hb              | 0.067  | 0.142          |
| DCP             | 0.041  | 0.433          |
| T-Bil           | -0.041 | 0.302          |
| Age             | -0.023 | 0.593          |

Abbreviations: AST,aspartate aminotransferase; ALT,alanine aminotransferase; FIB-4,fibrosis-4

Plt,platelet; Alb,albumin; HbA1c,hemoglobin A1c; AFP, $\alpha$ -fetoprotein

Hb,hemoglobin; DCP,des- $\gamma$ -carboxy prothrombin; T-bil,total bilirubin

Supplementary Table S2. Characteristics of patients in the validation cohort

|                 |                           | All(N=262)      | Missing(N) | Non HCC(N=243)  | HCC(N=19)       | <i>p</i> value |
|-----------------|---------------------------|-----------------|------------|-----------------|-----------------|----------------|
| Age             | Years Old                 | 68(58-74)       | 0          | 67(57-74)       | 75(68-77)       | 0.001          |
| Sex             | Male/Female               | 91/171          | 0          | 86/157          | 5/14            | 0.424          |
| HCV Group       | 1/2/Other                 | 224/29/0        | 9          | 215/28          | 9/1             | 0.882          |
| HCV-RNA(Pre)    | Log IU/mL                 | 6.2(5.7-6.5)    | 9          | 6.2(5.7-6.5)    | 5.7(4.7-5.9)    | 0.005          |
| BMI(Pre)        | kg/m <sup>2</sup>         | 22.6(20.1-24.7) | 0          | 22.6(20.0-24.6) | 23.3(20.3-26.9) | 0.415          |
| WBC             | /μL                       | 4720(4080-6060) | 2          | 4910(4140-6140) | 3850(3320-4620) | 0.005          |
| Hb              | g/dL                      | 13.3(12.3-14.3) | 2          | 13.4(12.4-14.4) | 12.8(11.6-13.7) | 0.127          |
| Plt             | ×10 <sup>4</sup> /μL      | 16.7(12.8-21.7) | 1          | 16.9(13.2-22.1) | 12.9(10.5-17.8) | 0.028          |
| AST             | U/L                       | 24(19-30)       | 1          | 23(19-29)       | 28(22-37)       | 0.299          |
| ALT             | U/L                       | 17(13-26)       | 1          | 17(13-26)       | 20(15-25)       | 0.637          |
| T-bil           | mg/dL                     | 0.7(0.6-0.9)    | 10         | 0.7(0.6-0.9)    | 0.9(0.6-1.7)    | 0.041          |
| eGFR            | mL/min/1.73m <sup>2</sup> | 70.5(61.3-80.7) | 10         | 70.5(61.3-80.6) | 71.7(63.0-82.4) | 0.838          |
| CRP             | mg/dL                     | 0.04(0.04-0.04) | 15         | 0.04(0.04-0.04) | 0.05(0.04-0.10) | 0.418          |
| HbA1c           | %                         | 5.5(5.3-5.9)    | 12         | 5.5(5.3-5.9)    | 5.6(5.0-5.8)    | 0.619          |
| Alb             | g/dL                      | 4.1(3.9-4.3)    | 1          | 4.1(3.9-4.3)    | 3.8(3.6-4.0)    | 0.0005         |
| Hyaluronic Acid | ng/mL                     | 83(48-165)      | 13         | 80(45-157)      | 371(179-469)    | 0.005          |
| AFP             | ng/mL                     | 4.0(2.8-6.0)    | 2          | 4.0(2.6-6.0)    | 6.0(4.7-9.0)    | <0.0001        |
| DCP             | mAU/mL                    | 19(15-24)       | 9          | 19(15-24)       | 20(15-27)       | 0.140          |
| FIB-4 index     |                           | 2.2(1.5-3.3)    | 1          | 2.1(1.5-3.1)    | 4.0(2.6-5.7)    | <0.0001        |
| TSP-2           | ng/μL                     | 43.6(29.0-65.2) | 0          | 42.4(28.9-62.1) | 72.1(54.0-96.2) | <0.0001        |

Abbreviations: HCC,hepatocellular carcinoma; HCV,hepatitis C virus; RNA,ribonucleic acid; BMI, body mass index; WBC,white blood cell; Hb,hemoglobin  
 Plt,platelet; AST,aspartate aminotransferase; ALT,alanine aminotransferase; T-bil,total bilirubin; eGFR,estimated glomerular filtration rate  
 CRP,c-reactive protein; HbA1c,hemoglobin A1c; Alb,albumin; AFP,α-fetoprotein; DCP,des-γ-carboxy prothrombin  
 FIB-4,fibrosis-4; TSP-2,thrombospondin-2
